# Supplementary material for: Electrocatalytic CO2 reduction reaction on dual-metal- and nitrogen-doped graphene: coordination environment effect of active sites
Source: Royal Society of Chemistry journal article supplement (doi:10.1039/d2ma00192f), 2022-01-01
Supplement: d2ma00192f1.pdf [file d2ma00192f1.pdf]

## **Electronic Supplementary Information (ESI)**

### **Electrocatalytic CO<sub>2</sub> reduction reaction on dual-metal- and nitrogen-doped graphene: Coordination environment effect of active sites**

Peinan He, Haisong Feng, Si Wang, Hu Ding, Yujie Liang, Min Ling and Xin Zhang\*

*State Key Laboratory of Chemical Resource Engineering, Beijing Advanced Innovation Center for Soft Matter Science and Engineering, Beijing University of Chemical Technology, Beijing 100029, China*

**\*Corresponding author. E-mail: zhangxin@mail.buct.edu.cn**

## Contents

| Title                                                                                                                                                                                                                  | Page         |
|------------------------------------------------------------------------------------------------------------------------------------------------------------------------------------------------------------------------|--------------|
| 1. The supercell size test of Ni/Fe-N <sub>6</sub> -Gra (Model 1, Model 2, Model 3) surfaces (Fig. S1)                                                                                                                 | S3           |
| 2. AIMD simulation result of water/NiFe-N <sub>6</sub> -Gra-Model 2 interface (Fig. S2)                                                                                                                                | S3           |
| 3. Optimized geometries of M <sub>1</sub> /M <sub>2</sub> -N <sub>6</sub> -Gra substrate, N-doped graphene substrate, *COOH, and *CO adsorbed M <sub>1</sub> /M <sub>2</sub> -N <sub>6</sub> -Gra (Fig. S3, S4, S5–S7) | S4, S5, S6   |
| 4. Test of *COOH Geometry (H-up and H-down) (Fig. S8)                                                                                                                                                                  | S7           |
| 5. Calculated limiting potentials for HER ( $U_L(\text{HER})$ ), CO <sub>2</sub> RR ( $U_L(\text{CO}_2\text{RR})$ ), and $U_L(\text{CO}_2\text{RR}) - U_L(\text{HER})$ on M-N <sub>4</sub> -Gra (Fig. S9)              | S7           |
| 6. Relative free energy diagrams of the hydrogenation of CO to *CHO/*COH (Fig. S10)                                                                                                                                    | S8           |
| 7. Charge density difference for Fe/Zn-N <sub>6</sub> -Gra, Mn/Zn-N <sub>6</sub> -Gra, Co/Zn-N <sub>6</sub> -Gra, and Fe/Mn-N <sub>6</sub> -Gra-Model 3 (Fig. S11)                                                     | S8           |
| 8. Calculated formation energies (Table S1)                                                                                                                                                                            | S9           |
| 9. Bond lengths between bimetals ( $d(\text{M}_1\text{—M}_2)$ ) (Table S2)                                                                                                                                             | S10          |
| 10. Free energy change values of elementary step for CO <sub>2</sub> RR (Table S3)                                                                                                                                     | S11          |
| 11. Calculated adsorption energies and adsorption free energies of *CO and *COOH (Table S4, S5)                                                                                                                        | S12, S13     |
| 12. Bond length of *CO and *COOH adsorbed M <sub>1</sub> /M <sub>2</sub> -N <sub>6</sub> -Gra ( $d(\text{M}_1\text{—C})$ and $d(\text{M}_2\text{—C})$ ) (Table S6, S7)                                                 | S14, S15–S16 |
| 13. Calculated limiting potentials of HER on Model 2 and Model 3 (Table S8)                                                                                                                                            | S17          |
| 14. Calculated <i>d</i> -band center of M <sub>1</sub> /M <sub>2</sub> -N <sub>6</sub> -Gra-Model 3 (Table S9)                                                                                                         | S18          |
| 15. Test of U values of Fe/Zn and Co/Zn-N <sub>6</sub> -Gra-Model 3 (Table S10)                                                                                                                                        | S18          |
| 16. Magnetic moments of metal atoms at different U values on Fe/Zn and CoZn-N <sub>6</sub> -Gra-Model 3 (Table S11)                                                                                                    | S19          |

|            | Model 1                                                                                               |                                                                                                       | Model 2                                                                                               |                                                                                                        | Model 3                                                                                                 |                                                                                                         |
|------------|-------------------------------------------------------------------------------------------------------|-------------------------------------------------------------------------------------------------------|-------------------------------------------------------------------------------------------------------|--------------------------------------------------------------------------------------------------------|---------------------------------------------------------------------------------------------------------|---------------------------------------------------------------------------------------------------------|
| Surpercell | *COOH                                                                                                 | *CO                                                                                                   | *COOH                                                                                                 | *CO                                                                                                    | *COOH                                                                                                   | *CO                                                                                                     |
| 4 × 3      | 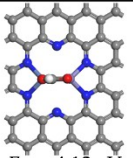<br>$E_a = -4.12$ eV | <br>$E_a = -3.28$ eV | <br>$E_a = -2.26$ eV | <br>$E_a = -1.81$ eV | <br>$E_a = -2.14$ eV | <br>$E_a = -0.96$ eV |
| 5 × 3      | <br>$E_a = -4.08$ eV | <br>$E_a = -3.36$ eV | <br>$E_a = -2.27$ eV | <br>$E_a = -1.83$ eV | <br>$E_a = -2.19$ eV | <br>$E_a = -1.04$ eV |
| 6 × 4      | <br>$E_a = -4.06$ eV | <br>$E_a = -3.20$ eV | <br>$E_a = -2.28$ eV | <br>$E_a = -1.86$ eV | <br>$E_a = -2.09$ eV | <br>$E_a = -1.01$ eV |

**Fig. S1** The adsorption energies ( $E_a$ ) of \*COOH and \*CO on 4 × 3, 5 × 3, and 6 × 4 supercells of Ni/Fe-N<sub>6</sub>-Gra (Model 1, Model 2, Model 3) surfaces, respectively.

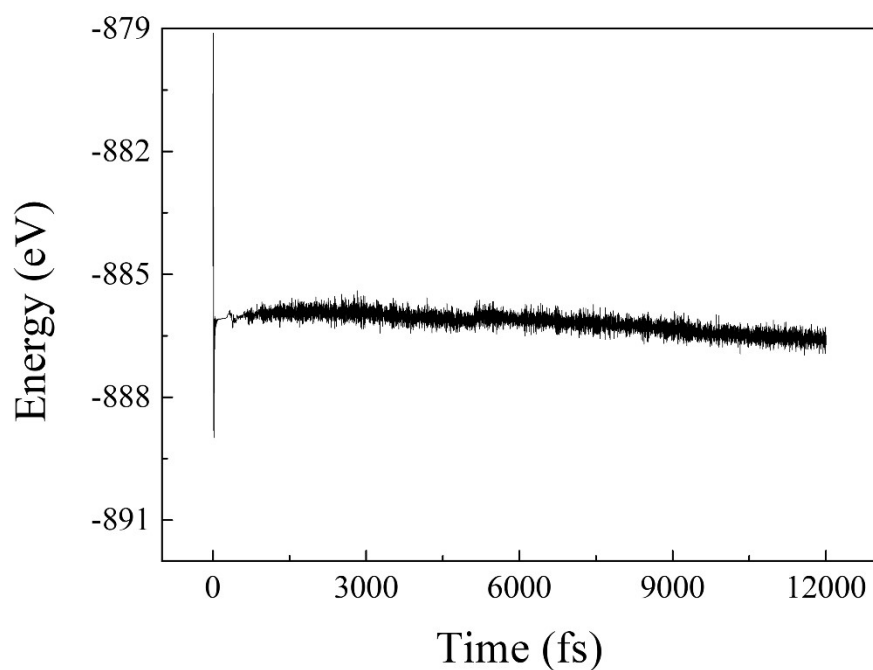

**Fig. S2** The AIMD simulation result of water/NiFe-N<sub>6</sub>-Gra-Model 2 interface.

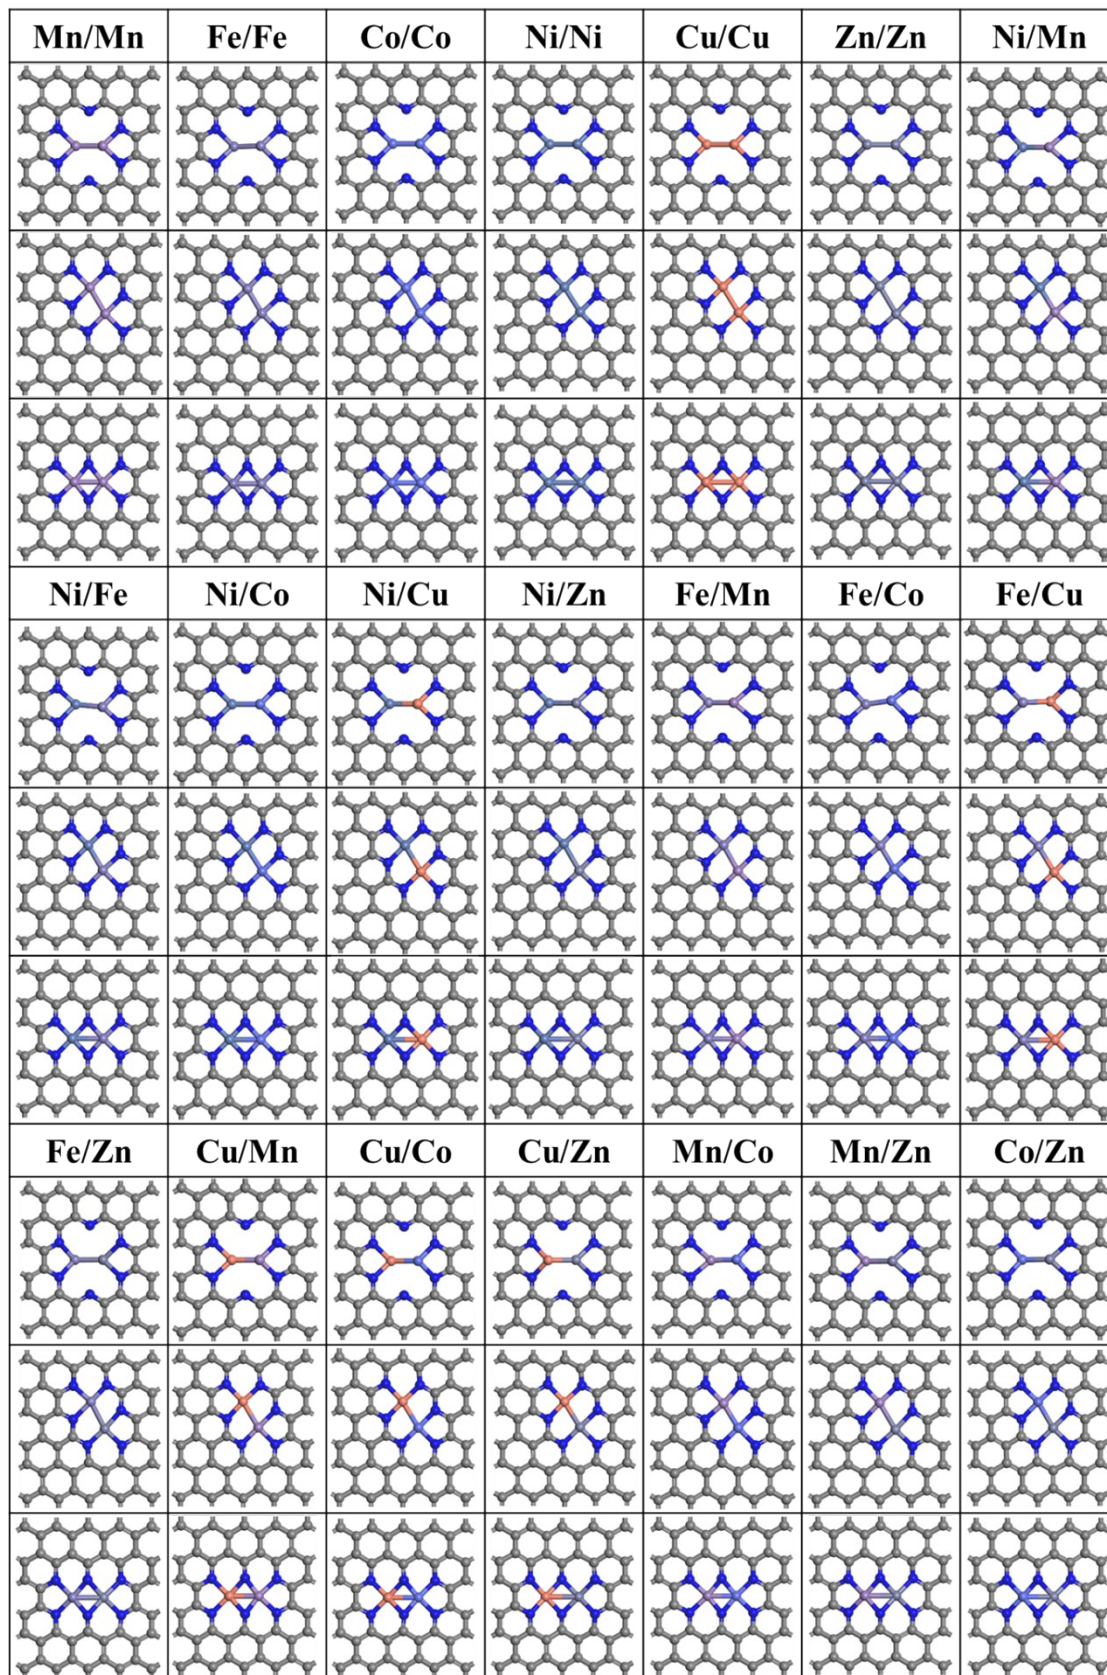

**Fig. S3** Optimized geometries of  $M_1/M_2$ -N<sub>6</sub>-Gra substrate on Model 1, Model 2, and Model 3 (top view).



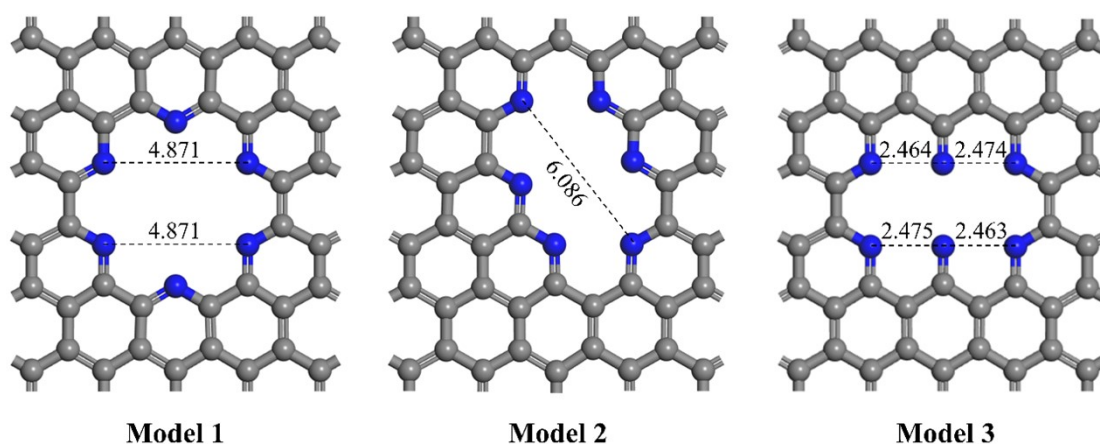

**Fig. S4** Optimized geometries of N-doped graphene substrate ( $N_6$ -Gra) on Model 1, Model 2, and Model 3. Unit is in Å.

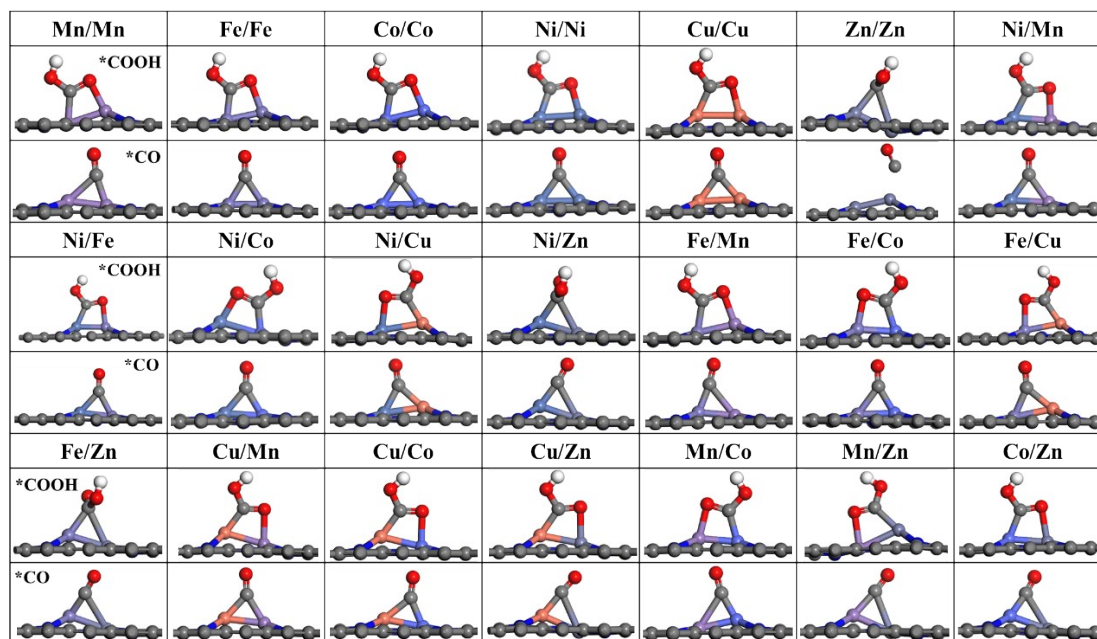

**Fig. S5** Optimized geometries of \*COOH and \*CO adsorbed  $M_1/M_2$ - $N_6$ -Gra on Model 1 (side view).

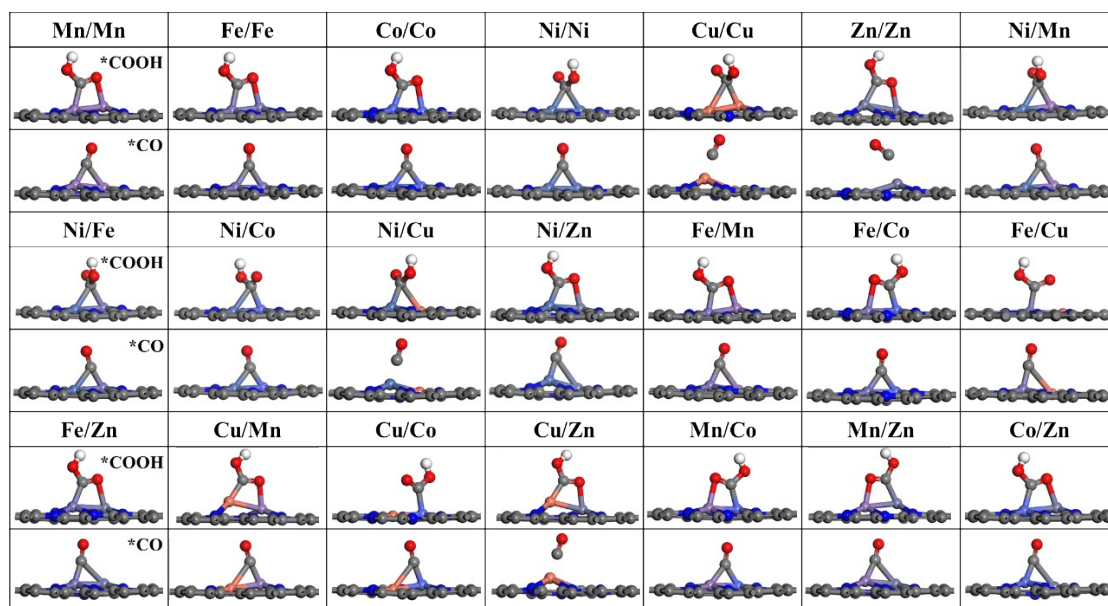

**Fig. S6** Optimized geometries of \*COOH and \*CO adsorbed  $M_1/M_2$ -N<sub>6</sub>-Gra on Model 2 (side view).

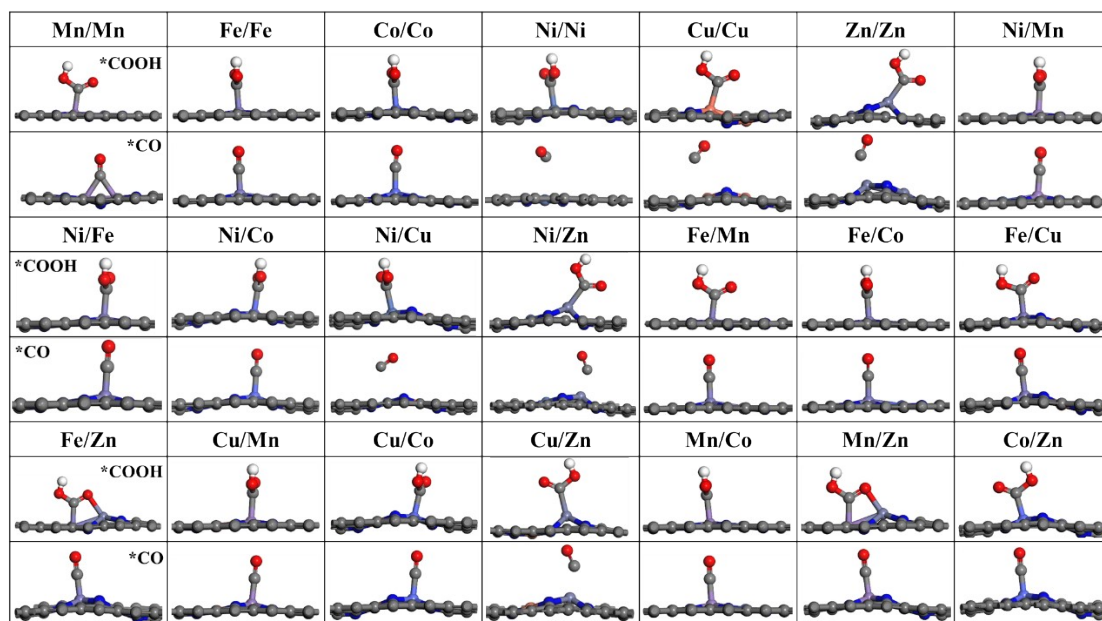

**Fig. S7** Optimized geometries of \*COOH and \*CO adsorbed  $M_1/M_2$ -N<sub>6</sub>-Gra on Model 3 (side view).

|                           | *COOH  | Model 1                                                                                               | Model 2                                                                                                | Model 3                                                                                                 |
|---------------------------|--------|-------------------------------------------------------------------------------------------------------|--------------------------------------------------------------------------------------------------------|---------------------------------------------------------------------------------------------------------|
| Ni/Fe-N <sub>6</sub> -Gra | H-up   | 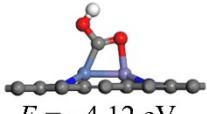<br>$E_a = -4.12$ eV | <br>$E_a = -2.26$ eV | <br>$E_a = -2.14$ eV |
|                           | H-down | <br>$E_a = -4.00$ eV | <br>$E_a = -1.77$ eV | <br>$E_a = -2.06$ eV |
| Fe/Zn-N <sub>6</sub> -Gra | H-up   | <br>$E_a = -2.97$ eV | <br>$E_a = -3.08$ eV | <br>$E_a = -2.35$ eV |
|                           | H-down | <br>$E_a = -2.88$ eV | <br>$E_a = -2.98$ eV | <br>$E_a = -2.26$ eV |

**Fig. S8** Optimized geometries and adsorption energies ( $E_a$ ) of adsorbed cis-COOH (H-up) and trans-COOH (H-down) on Ni/Fe-N<sub>6</sub>-Gra and Fe/Zn-N<sub>6</sub>-Gra.

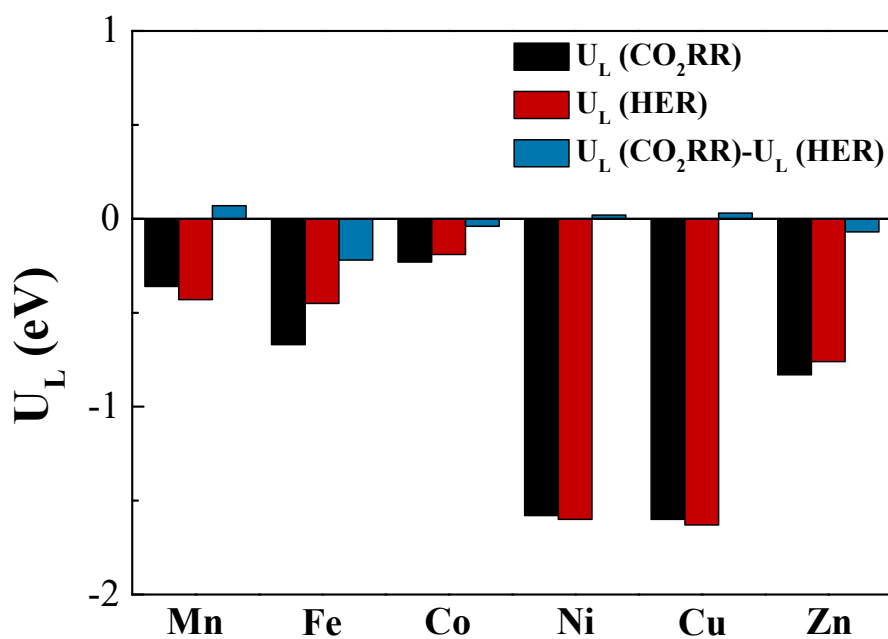

**Fig. S9** Calculated limiting potentials for HER ( $U_L$ (HER)), CO<sub>2</sub>RR ( $U_L$ (CO<sub>2</sub>RR)), and ( $U_L$ (CO<sub>2</sub>RR) -  $U_L$ (HER)) on M-N<sub>4</sub>-Gra (M = Mn, Fe, Co, Ni, Cu, and Zn).

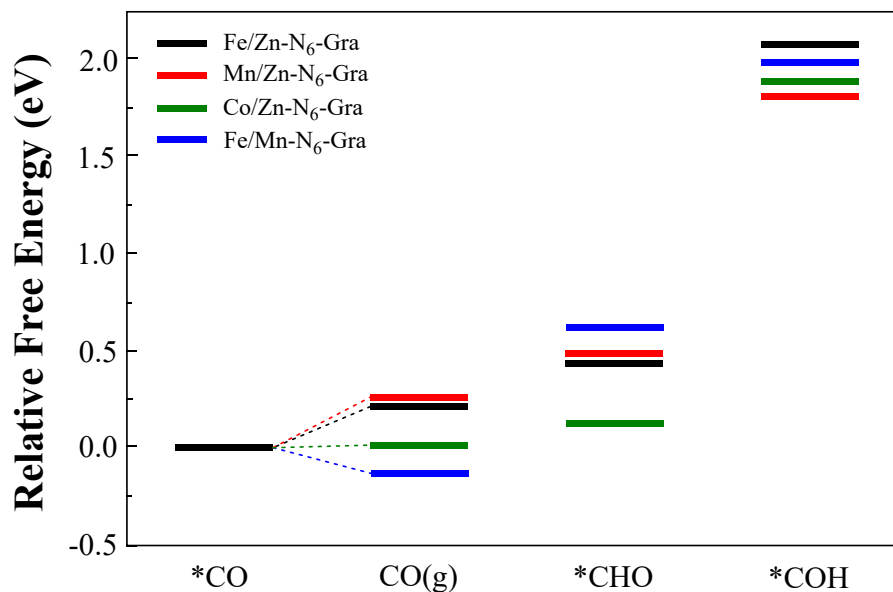

**Fig. S10** Relative free energy diagrams of the hydrogenation of CO to \*CHO and \*COH.

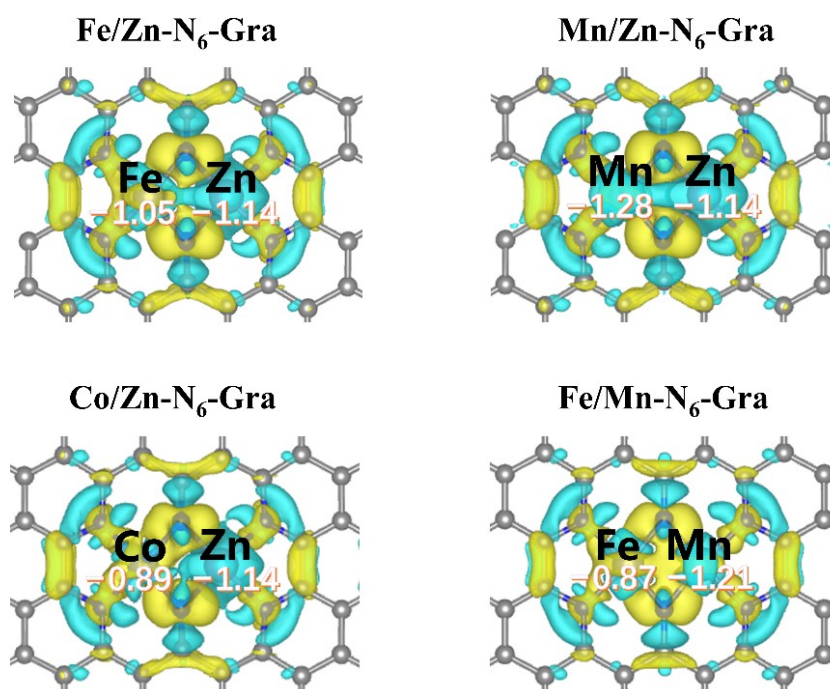

**Fig. S11** The charge density difference for Fe/Zn-N<sub>6</sub>-Gra, Mn/Zn-N<sub>6</sub>-Gra, Co/Zn-N<sub>6</sub>-Gra, and Fe/Mn-N<sub>6</sub>-Gra. Yellow: charge accumulation; Cyan: charge depletion. The isosurface value is set to 0.003 e/Bohr<sup>3</sup>.



**Table S1.** The formation energies ( $E_f$ ) on  $M_1/M_2-N_6$ -Gra.

| $M_1/M_2-N_6$ -Gra | $E_f$ (eV) |         |         |
|--------------------|------------|---------|---------|
|                    | Model 1    | Model 2 | Model 3 |
| Ni/Mn              | 1.12       | -2.20   | -6.91   |
| Ni/Fe              | 3.01       | -0.91   | -5.75   |
| Ni/Co              | 2.09       | -1.27   | -5.94   |
| Ni/Ni              | 1.70       | -1.93   | -6.03   |
| Ni/Cu              | 1.60       | -1.39   | -4.58   |
| Ni/Zn              | 0.56       | -1.86   | -5.22   |
| Fe/Mn              | 1.98       | -0.70   | -7.27   |
| Fe/Fe              | 2.83       | -0.02   | -6.19   |
| Fe/Co              | 3.26       | -0.68   | -6.27   |
| Fe/Cu              | 2.16       | -0.43   | -4.00   |
| Fe/Zn              | 0.97       | -0.58   | -4.79   |
| Cu/Mn              | 2.33       | -1.47   | -5.15   |
| Cu/Co              | 2.11       | -0.98   | -4.27   |
| Cu/Cu              | 1.65       | -4.90   | -3.40   |
| Cu/Zn              | 0.42       | -1.90   | -4.07   |
| Mn/Mn              | 1.11       | -1.42   | -8.12   |
| Mn/Co              | 1.39       | -1.41   | -7.46   |
| Mn/Zn              | 1.10       | -1.70   | -5.96   |
| Co/Co              | 2.61       | -0.87   | -6.24   |
| Co/Zn              | 0.88       | -1.21   | -4.89   |
| Zn/Zn              | -1.47      | -2.22   | -4.58   |

**Table S2.** Bond lengths between bimetals on M<sub>1</sub>/M<sub>2</sub>-N<sub>6</sub>-Gra.

| M <sub>1</sub> /M <sub>2</sub> -N <sub>6</sub> -Gra | $d(\text{M}_1\text{—M}_2)$ (Å) |         |         |
|-----------------------------------------------------|--------------------------------|---------|---------|
|                                                     | Model 1                        | Model 2 | Model 3 |
| Ni/Mn                                               | 2.252                          | 2.264   | 2.462   |
| Ni/Fe                                               | 2.216                          | 2.274   | 2.438   |
| Ni/Co                                               | 2.247                          | 2.307   | 2.423   |
| Ni/Ni                                               | 2.342                          | 2.341   | 2.580   |
| Ni/Cu                                               | 2.298                          | 2.381   | 2.547   |
| Ni/Zn                                               | 2.294                          | 2.425   | 2.546   |
| Fe/Mn                                               | 2.134                          | 2.337   | 2.236   |
| Fe/Fe                                               | 2.281                          | 2.208   | 2.221   |
| Fe/Co                                               | 2.108                          | 2.166   | 2.250   |
| Fe/Cu                                               | 2.289                          | 2.397   | 2.445   |
| Fe/Zn                                               | 2.303                          | 2.430   | 2.451   |
| Cu/Mn                                               | 2.230                          | 2.398   | 2.325   |
| Cu/Co                                               | 2.290                          | 2.395   | 2.428   |
| Cu/Cu                                               | 2.329                          | 2.382   | 2.576   |
| Cu/Zn                                               | 2.241                          | 2.386   | 2.632   |
| Mn/Mn                                               | 2.217                          | 2.372   | 2.266   |
| Mn/Co                                               | 2.184                          | 2.224   | 2.258   |
| Mn/Zn                                               | 2.315                          | 2.491   | 2.514   |
| Co/Co                                               | 2.236                          | 2.229   | 2.258   |
| Co/Zn                                               | 2.310                          | 2.408   | 2.470   |
| Zn/Zn                                               | 2.221                          | 2.546   | 2.553   |

**Table S3.** Free energy change values of elementary steps for CO<sub>2</sub>RR at  $U = 0$  V on M<sub>1</sub>/M<sub>2</sub>-N<sub>6</sub>-Gra. Unit is in eV.

| M <sub>1</sub> /M <sub>2</sub> -<br>N <sub>6</sub> -Gra | Model 1      |              |              | Model 2      |              |              | Model 3      |              |              |
|---------------------------------------------------------|--------------|--------------|--------------|--------------|--------------|--------------|--------------|--------------|--------------|
|                                                         | $\Delta G_1$ | $\Delta G_2$ | $\Delta G_3$ | $\Delta G_1$ | $\Delta G_2$ | $\Delta G_3$ | $\Delta G_1$ | $\Delta G_2$ | $\Delta G_3$ |
| Ni/Mn                                                   | -1.13        | -0.30        | 1.56         | 0.30         | -0.56        | 0.39         | 0.31         | -0.36        | 0.18         |
| Ni/Fe                                                   | -1.61        | -0.61        | 2.35         | 0.23         | -0.98        | 0.87         | 0.39         | -0.29        | 0.03         |
| Ni/Co                                                   | -0.47        | -1.13        | 1.73         | -0.08        | -0.81        | 1.02         | 0.54         | -0.08        | -0.33        |
| Ni/Ni                                                   | -0.19        | -1.33        | 1.65         | 0.62         | -0.58        | 0.09         | 1.47         | -0.66        | -0.68        |
| Ni/Cu                                                   | -0.23        | -1.10        | 1.46         | 0.73         | -0.58        | -0.03        | 1.49         | -0.63        | -0.73        |
| Ni/Zn                                                   | -0.73        | -0.87        | 1.73         | 0.09         | -0.55        | 0.59         | 1.06         | -0.34        | -0.59        |
| Fe/Mn                                                   | -1.20        | -0.29        | 1.62         | -0.65        | -0.68        | 1.46         | 0.26         | 0.01         | -0.14        |
| Fe/Fe                                                   | -0.82        | -0.55        | 1.50         | -0.32        | -0.77        | 1.22         | 0.48         | -0.06        | -0.29        |
| Fe/Co                                                   | -1.54        | -0.65        | 2.32         | 0.10         | -0.91        | 0.94         | 0.42         | 0.01         | -0.30        |
| Fe/Cu                                                   | -0.62        | -0.72        | 1.47         | 0.01         | -0.68        | 0.80         | 0.22         | -0.34        | 0.25         |
| Fe/Zn                                                   | -0.47        | -0.75        | 1.35         | -0.56        | -0.65        | 1.34         | 0.19         | -0.30        | 0.24         |
| Cu/Mn                                                   | -2.32        | -0.05        | 2.50         | 0.17         | -0.55        | 0.51         | 0.25         | -0.39        | 0.27         |
| Cu/Co                                                   | -0.57        | -0.97        | 1.67         | 0.13         | -0.64        | 0.64         | 0.42         | 0.04         | -0.33        |
| Cu/Cu                                                   | -0.33        | -0.97        | 1.43         | 1.09         | -0.79        | -0.17        | 1.83         | -0.98        | -0.72        |
| Cu/Zn                                                   | -0.59        | 0.07         | 0.65         | 0.40         | -0.19        | -0.08        | 0.86         | -0.10        | -0.63        |
| Mn/Mn                                                   | -0.81        | -0.38        | 1.32         | -0.57        | -0.75        | 1.45         | 0.08         | 0.32         | -0.27        |
| Mn/Co                                                   | -1.15        | -0.46        | 1.74         | -0.53        | -0.56        | 1.22         | 0.34         | -0.42        | 0.21         |
| Mn/Zn                                                   | -1.26        | -0.60        | 1.99         | -0.63        | -0.32        | 1.08         | 0.15         | -0.28        | 0.26         |
| Co/Co                                                   | -0.85        | -0.84        | 1.82         | 0.09         | -1.31        | 1.35         | 0.89         | 0.06         | -0.82        |
| Co/Zn                                                   | -0.55        | -0.99        | 1.67         | -0.45        | -0.62        | 1.20         | 0.20         | -0.09        | 0.02         |
| Zn/Zn                                                   | 0.81         | -0.18        | -0.50        | -0.50        | 1.08         | -0.45        | 1.01         | -0.37        | -0.51        |

Note: The red values represent the maximum free energy change values on the reaction pathway.

**Table S4.** Adsorption energies of \*CO and \*COOH on M<sub>1</sub>/M<sub>2</sub>-N<sub>6</sub>-Gra. Unit is in eV.

| M <sub>1</sub> /M <sub>2</sub> -N <sub>6</sub> -<br>Gra | Model 1       |             | Model2        |             | Model 3       |             |
|---------------------------------------------------------|---------------|-------------|---------------|-------------|---------------|-------------|
|                                                         | $E_a$ (*COOH) | $E_a$ (*CO) | $E_a$ (*COOH) | $E_a$ (*CO) | $E_a$ (*COOH) | $E_a$ (*CO) |
| Ni/Mn                                                   | -3.65         | -2.49       | -2.17         | -1.34       | -2.18         | -1.11       |
| Ni/Fe                                                   | -4.12         | -3.28       | -2.26         | -1.81       | -2.14         | -0.96       |
| Ni/Co                                                   | -2.98         | -2.66       | -2.58         | -1.96       | -1.96         | -0.58       |
| Ni/Ni                                                   | -2.72         | -2.61       | -1.90         | -1.00       | -1.01         | -0.09       |
| Ni/Cu                                                   | -2.74         | -2.40       | -1.77         | -0.89       | -1.01         | -0.07       |
| Ni/Zn                                                   | -3.20         | -2.69       | -2.42         | -1.49       | -1.40         | -0.27       |
| Fe/Mn                                                   | -3.69         | -2.53       | -3.18         | -2.40       | -2.25         | -0.80       |
| Fe/Fe                                                   | -3.33         | -2.41       | -2.83         | -2.17       | -2.04         | -0.64       |
| Fe/Co                                                   | -4.06         | -3.25       | -2.45         | -1.89       | -2.09         | -0.64       |
| Fe/Cu                                                   | -3.13         | -2.39       | -2.47         | -1.76       | -2.28         | -1.18       |
| Fe/Zn                                                   | -2.97         | -2.27       | -3.08         | -2.28       | -2.35         | -1.17       |
| Cu/Mn                                                   | -4.86         | -3.46       | -2.34         | -1.42       | -2.25         | -1.20       |
| Cu/Co                                                   | -3.07         | -2.59       | -2.38         | -1.56       | -2.09         | -0.76       |
| Cu/Cu                                                   | -2.82         | -2.36       | -1.37         | -0.75       | -0.65         | -0.08       |
| Cu/Zn                                                   | -3.12         | -1.60       | -2.13         | -0.85       | -1.63         | -0.21       |
| Mn/Mn                                                   | -3.32         | -2.23       | -3.09         | -2.34       | -2.41         | -0.65       |
| Mn/Co                                                   | -3.65         | -2.66       | -3.09         | -2.16       | -2.16         | -1.15       |
| Mn/Zn                                                   | -3.75         | -2.93       | -3.13         | -2.00       | -2.39         | -1.86       |
| Co/Co                                                   | -3.35         | -2.75       | -2.45         | -2.30       | -1.61         | -0.11       |
| Co/Zn                                                   | -3.04         | -2.61       | -2.97         | -2.14       | -2.29         | -0.96       |
| Zn/Zn                                                   | -1.68         | -0.38       | -3.03         | -0.40       | -1.48         | -0.34       |

**Table S5.** Adsorption free energies of \*CO and \*COOH on M<sub>1</sub>/M<sub>2</sub>-N<sub>6</sub>-Gra. Unit is in eV.

| M <sub>1</sub> /M <sub>2</sub> -N <sub>6</sub> -Gra | Model 1            |                  | Model2             |                  | Model 3            |                  |
|-----------------------------------------------------|--------------------|------------------|--------------------|------------------|--------------------|------------------|
|                                                     | $\Delta G_{*COOH}$ | $\Delta G_{*CO}$ | $\Delta G_{*COOH}$ | $\Delta G_{*CO}$ | $\Delta G_{*COOH}$ | $\Delta G_{*CO}$ |
| Ni/Mn                                               | -3.12              | -2.35            | -1.69              | -1.18            | -1.68              | -0.97            |
| Ni/Fe                                               | -3.60              | -3.14            | -1.78              | -1.64            | -1.59              | -0.81            |
| Ni/Co                                               | -2.46              | -2.52            | -2.07              | -1.81            | -1.46              | -0.45            |
| Ni/Ni                                               | -2.18              | -2.44            | -1.38              | -0.88            | -0.52              | -0.11            |
| Ni/Cu                                               | -2.23              | -2.25            | -1.27              | -0.77            | -0.50              | -0.06            |
| Ni/Zn                                               | -2.73              | -2.52            | -1.90              | -1.38            | -0.70              | -0.18            |
| Fe/Mn                                               | -3.19              | -2.41            | -2.64              | -2.25            | -1.74              | -0.65            |
| Fe/Fe                                               | -2.81              | -2.29            | -2.31              | -2.01            | -1.52              | -0.50            |
| Fe/Co                                               | -3.54              | -3.11            | -1.90              | -1.73            | -1.57              | -0.49            |
| Fe/Cu                                               | -2.61              | -2.26            | -1.99              | -1.59            | -1.78              | -1.04            |
| Fe/Zn                                               | -2.46              | -2.14            | -2.55              | -2.13            | -1.81              | -1.03            |
| Cu/Mn                                               | -4.31              | -3.29            | -1.83              | -1.30            | -1.74              | -1.06            |
| Cu/Co                                               | -2.56              | -2.46            | -1.86              | -1.43            | -1.58              | -0.46            |
| Cu/Cu                                               | -2.32              | -2.22            | -0.91              | -0.62            | -0.17              | -0.07            |
| Cu/Zn                                               | -2.58              | -1.44            | -1.60              | -0.71            | -1.13              | -0.17            |
| Mn/Mn                                               | -2.81              | -2.11            | -2.56              | -2.24            | -1.92              | -0.52            |
| Mn/Co                                               | -3.14              | -2.53            | -2.53              | -2.01            | -1.66              | -1.00            |
| Mn/Zn                                               | -3.25              | -2.78            | -2.62              | -1.87            | -1.84              | -1.05            |
| Co/Co                                               | -2.84              | -2.61            | -1.91              | -2.14            | -1.11              | 0.03             |
| Co/Zn                                               | -2.55              | -2.46            | -2.44              | -1.99            | -1.79              | -0.81            |
| Zn/Zn                                               | -1.18              | -0.28            | -2.50              | -0.34            | -0.99              | -0.28            |



**Table S6.** Bond lengths ( $d(M_1-C)$  and  $d(M_2-C)$ ) of \*CO adsorbed  $M_1/M_2-N_6$ -Gra. Unit is in Å.

| $M_1/M_2-N_6$ -Gra | Model 1    |            | Model 2    |            | Model 3    |            |
|--------------------|------------|------------|------------|------------|------------|------------|
|                    | $d(M_1-C)$ | $d(M_2-C)$ | $d(M_1-C)$ | $d(M_2-C)$ | $d(M_1-C)$ | $d(M_2-C)$ |
| Ni/Mn              | 1.832      | 1.986      | 2.043      | 1.816      | —          | 1.745      |
| Ni/Fe              | 1.905      | 1.871      | 2.119      | 1.747      | —          | 1.734      |
| Ni/Co              | 1.901      | 1.835      | 1.992      | 1.766      | —          | 1.739      |
| Ni/Ni              | 1.852      | 1.852      | 1.929      | 1.924      | —          | —          |
| Ni/Cu              | 1.810      | 1.911      | 1.771      | 2.829      | —          | —          |
| Ni/Zn              | 1.701      | 2.378      | 1.736      | 2.745      | —          | —          |
| Fe/Mn              | 1.752      | 2.313      | 1.728      | 2.318      | 1.725      | —          |
| Fe/Fe              | 1.891      | 1.912      | 1.879      | 1.879      | 1.726      | —          |
| Fe/Co              | 2.017      | 1.807      | 1.859      | 1.868      | 1.726      | —          |
| Fe/Cu              | 1.840      | 1.942      | 1.719      | 2.728      | 1.722      | —          |
| Fe/Zn              | 1.750      | 2.508      | 1.740      | 2.403      | 1.721      | —          |
| Cu/Mn              | 1.907      | 1.935      | 2.404      | 1.804      | —          | 1.747      |
| Cu/Co              | 1.962      | 1.787      | 2.512      | 1.748      | —          | 1.740      |
| Cu/Cu              | 1.855      | 1.862      | —          | —          | —          | —          |
| Cu/Zn              | 1.777      | 2.528      | —          | —          | —          | —          |
| Mn/Mn              | 2.173      | 1.801      | 1.785      | 2.158      | 1.973      | 1.973      |
| Mn/Co              | 2.350      | 1.736      | 1.938      | 1.845      | 1.749      | —          |
| Mn/Zn              | 1.865      | 2.489      | 1.795      | 2.294      | 1.765      | —          |
| Co/Co              | 1.858      | 1.886      | 1.846      | 1.848      | 1.818      | —          |
| Co/Zn              | 1.719      | 2.472      | 1.725      | 2.442      | 1.731      | —          |
| Zn/Zn              | —          | —          | —          | —          | —          | —          |

**Table S7.** Bond lengths of \*COOH adsorbed M<sub>1</sub>/M<sub>2</sub>-N<sub>6</sub>-Gra on Model 1, Model 2, and Model 3. Unit is in Å.

| Model 1 | $d(M_1-C)$ | $d(M_1-O)$ | $d(M_2-C)$ | $d(M_2-O)$ |
|---------|------------|------------|------------|------------|
| Ni/Mn   | 1.829      | —          | —          | 1.920      |
| Ni/Fe   | 1.854      | —          | —          | 2.007      |
| Ni/Co   | —          | 1.927      | 1.797      | —          |
| Ni/Ni   | 1.821      | —          | —          | 1.955      |
| Ni/Cu   | —          | 2.022      | 1.871      | —          |
| Ni/Zn   | 1.888      | —          | 2.434      | —          |
| Fe/Mn   | 1.870      | —          | —          | 1.990      |
| Fe/Fe   | 1.832      | —          | —          | 1.983      |
| Fe/Co   | —          | 1.982      | 1.853      | —          |
| Fe/Cu   | —          | 2.045      | 1.880      | —          |
| Fe/Zn   | 1.951      | —          | 2.484      | —          |
| Cu/Mn   | 1.871      | —          | —          | 2.101      |
| Cu/Co   | 1.879      | —          | —          | 2.042      |
| Cu/Cu   | 1.870      | —          | —          | 2.001      |
| Cu/Zn   | 1.878      | —          | —          | 2.105      |
| Mn/Mn   | 1.870      | —          | 1.986      | —          |
| Mn/Co   | —          | 2.004      | 1.836      | —          |
| Mn/Zn   | —          | 2.198      | 1.968      | —          |
| Co/Co   | 1.853      | —          | —          | 1.957      |
| Co/Zn   | 1.872      | —          | —          | 2.151      |
| Zn/Zn   | 2.025      | —          | 2.733      | —          |

  

| Model 2 | $d(M_1-C)$ | $d(M_1-O)$ | $d(M_2-C)$ | $d(M_2-O)$ |
|---------|------------|------------|------------|------------|
| Ni/Mn   | 2.261      | —          | 2.006      | —          |
| Ni/Fe   | 2.189      | —          | 1.952      | —          |
| Ni/Co   | 2.365      | —          | 1.909      | —          |
| Ni/Ni   | 2.046      | —          | 2.070      | —          |
| Ni/Cu   | 1.941      | —          | 2.515      | —          |
| Ni/Zn   | 1.877      | —          | —          | 2.139      |
| Fe/Mn   | 1.840      | —          | —          | 2.078      |
| Fe/Fe   | 1.854      | —          | —          | 2.014      |
| Fe/Co   | —          | 2.260      | 1.857      | —          |
| Fe/Cu   | 1.864      | —          | —          | —          |
| Fe/Zn   | 1.916      | —          | —          | 2.070      |
| Cu/Mn   | 1.869      | —          | —          | 2.052      |
| Cu/Co   | —          | —          | 1.862      | —          |

|       |       |       |       |       |
|-------|-------|-------|-------|-------|
| Cu/Cu | 2.009 | —     | 2.575 | —     |
| Cu/Zn | 1.881 | —     | —     | 2.044 |
| Mn/Mn | 1.924 | —     | —     | 2.106 |
| Mn/Co | —     | 2.181 | 1.845 | —     |
| Mn/Zn | —     | 2.119 | 2.020 | —     |
| Co/Co | 1.855 | —     | —     | 2.152 |
| Co/Zn | 1.854 | —     | —     | 2.084 |
| Zn/Zn | 2.003 | —     | —     | 2.098 |

---

| Model 3 | $d(M_1—C)$ | $d(M_1—O)$ | $d(M_2—C)$ | $d(M_2—O)$ |
|---------|------------|------------|------------|------------|
| Ni/Mn   | —          | —          | 1.947      | —          |
| Ni/Fe   | —          | —          | 1.923      | —          |
| Ni/Co   | —          | —          | 1.897      | —          |
| Ni/Ni   | 1.963      | —          | —          | —          |
| Ni/Cu   | 1.952      | —          | —          | —          |
| Ni/Zn   | —          | —          | 2.019      | —          |
| Fe/Mn   | 1.882      | —          | —          | —          |
| Fe/Fe   | 1.920      | —          | —          | —          |
| Fe/Co   | 1.914      | —          | —          | —          |
| Fe/Cu   | 1.918      | —          | —          | —          |
| Fe/Zn   | 1.880      | —          | —          | 2.091      |
| Cu/Mn   | —          | —          | —          | 1.951      |
| Cu/Co   | —          | —          | —          | 1.894      |
| Cu/Cu   | 2.028      | —          | —          | —          |
| Cu/Zn   | —          | —          | —          | 2.071      |
| Mn/Mn   | 1.950      | —          | —          | —          |
| Mn/Co   | 1.960      | —          | —          | —          |
| Mn/Zn   | 1.917      | —          | —          | 2.065      |
| Co/Co   | 1.912      | —          | —          | —          |
| Co/Zn   | 1.886      | —          | —          | —          |
| Zn/Zn   | 2.020      | —          | —          | —          |

---

**Table S8.** The limiting potentials of HER at  $U = 0$  V on Model 2, and Model 3. Unit is in V.

| $M_1/M_2$ -N <sub>6</sub> -Gra | Model 2 | Model 3 |
|--------------------------------|---------|---------|
| Ni/Mn                          | -0.14   | -0.31   |
| Ni/Fe                          | -0.08   | -0.33   |
| Ni/Co                          | -0.35   | -0.50   |
| Ni/Ni                          | -0.10   | -1.37   |
| Ni/Cu                          | -0.41   | -1.37   |
| Ni/Zn                          | -0.16   | -1.15   |
| Fe/Mn                          | -0.61   | -0.29   |
| Fe/Fe                          | -0.40   | -0.41   |
| Fe/Co                          | -0.10   | -0.37   |
| Fe/Cu                          | -0.17   | -0.20   |
| Fe/Zn                          | -0.67   | -0.32   |
| Cu/Mn                          | -0.07   | -0.22   |
| Cu/Co                          | -0.16   | -0.37   |
| Cu/Cu                          | -0.77   | -1.94   |
| Cu/Zn                          | -0.25   | -0.76   |
| Mn/Mn                          | -0.71   | -0.05   |
| Mn/Co                          | -0.54   | -0.31   |
| Mn/Zn                          | -0.59   | -0.33   |
| Co/Co                          | -0.21   | -0.82   |
| Co/Zn                          | -0.50   | -0.25   |
| Zn/Zn                          | -0.61   | -1.00   |

**Table S9.** The  $d$ -band center ( $\varepsilon_d$ ) of  $M_1/M_2$ -N<sub>6</sub>-Gra-Model 3. Unit is in eV.

| $M_1/M_2$ -N <sub>6</sub> -Gra | $\varepsilon_d (M_1)$ | $\varepsilon_d (M_2)$ |
|--------------------------------|-----------------------|-----------------------|
| Mn/Mn                          | -0.74                 | -0.74                 |
| Fe/Fe                          | -1.53                 | -1.52                 |
| Co/Co                          | -1.96                 | -1.97                 |
| Ni/Ni                          | -1.93                 | -1.94                 |
| Cu/Cu                          | -3.37                 | -3.37                 |
| Zn/Zn                          | -5.86                 | -5.87                 |
| Ni/Mn                          | -2.00                 | -0.86                 |
| Ni/Fe                          | -2.22                 | -1.49                 |
| Ni/Co                          | -2.38                 | -1.67                 |
| Ni/Cu                          | -1.86                 | -3.69                 |
| Ni/Zn                          | -1.33                 | -5.88                 |
| Fe/Mn                          | -1.42                 | -0.95                 |
| Fe/Co                          | -1.33                 | -1.80                 |
| Fe/Cu                          | -1.53                 | -3.53                 |
| Fe/Zn                          | -1.55                 | -6.34                 |
| Cu/Mn                          | -3.68                 | -1.07                 |
| Cu/Co                          | -3.44                 | -1.38                 |
| Cu/Zn                          | -3.78                 | -6.28                 |
| Mn/Co                          | -1.27                 | -1.75                 |
| Mn/Zn                          | -0.76                 | -6.18                 |
| Co/Zn                          | -1.18                 | -6.07                 |

**Table S10.** The adsorption energies of intermediates, free energy change values of elementary steps and limiting potentials of Fe/Zn-N<sub>6</sub>-Gra-Model 3 and Co/Zn-N<sub>6</sub>-Gra-Model 3 at different U values and Cu/Fe-N<sub>6</sub>-Gra-Model 2 at U = 4 eV. Unit is in eV.

|                   | U value | $E_a(*\text{COOH})$ | $E_a(*\text{CO})$ | $\Delta G_1$ | $\Delta G_2$ | $\Delta G_3$ | $U_L$ (V) |
|-------------------|---------|---------------------|-------------------|--------------|--------------|--------------|-----------|
| Fe/Zn-<br>Model 3 | U = 3   | -1.70               | -0.45             | 0.85         | -0.28        | -0.44        | -0.85     |
|                   | U = 4   | -1.54               | -0.32             | 1.00         | -0.25        | -0.61        | -1.00     |
|                   | U = 5   | -1.09               | -0.27             | 1.45         | -0.73        | -0.59        | -1.45     |
|                   | U = 6   | -0.91               | -0.36             | 1.61         | -0.97        | -0.50        | -1.61     |
| Co/Zn-<br>Model 3 | U = 3   | -2.29               | -0.96             | 0.44         | -0.14        | -0.17        | -0.44     |
|                   | U = 4   | -2.05               | -0.72             | 0.61         | -0.23        | -0.25        | -0.61     |
|                   | U = 5   | -1.90               | -0.64             | 0.81         | -0.35        | -0.34        | -0.81     |
|                   | U = 6   | -1.69               | -0.54             | 1.01         | -0.46        | -0.43        | -1.01     |
| Cu/Fe-<br>Model 2 | U = 4   | -1.40               | -0.80             | 1.08         | -0.84        | -0.11        | -1.08     |



**Table S11.** Magnetic moments of metal atoms at different U values on Fe/Zn and Co/Zn-N<sub>6</sub>-Gra-Model 3 Unit is in  $\mu_B$ .

| U value | Fe/Zn                |                      | Co/Zn                |                      |
|---------|----------------------|----------------------|----------------------|----------------------|
|         | mag(M <sub>1</sub> ) | mag(M <sub>2</sub> ) | mag(M <sub>1</sub> ) | mag(M <sub>2</sub> ) |
| U = 3   | 2.625                | 0.011                | -1.123               | 0.077                |
| U = 4   | 2.724                | 0.015                | -1.060               | 0.002                |
| U = 5   | 2.992                | 0.001                | -1.089               | 0.001                |
| U = 6   | 3.198                | 0.002                | -1.733               | 0.001                |
